# Supplementary material for: Enhanced photovoltaic effect in Bi2FeMo0.7Ni0.3O6 ferroelectric thin films by tuning the thickness
Source: Royal Society of Chemistry journal article supplement (doi:10.1039/c9tc04973h), 2019-12-04
Supplement: c9tc04973h1.pdf [file c9tc04973h1.pdf]

## Supporting Information

### Enhanced photovoltaic effect in $\text{Bi}_2\text{FeMo}_{0.7}\text{Ni}_{0.3}\text{O}_6$ ferroelectric thin films by tuning the thickness

Xiaxia Cui<sup>a,b</sup>, Yong Li,<sup>abc,\*</sup> Xiaowei Li,<sup>ab</sup> Xihong Hao<sup>ab,\*</sup>

<sup>a</sup> Key Laboratory of Integrated Exploitation of Bayan Obo Multi-Metal Resources, Inner Mongolia University of Science and Technology, Baotou 014010, China xhhao@imust.cn

<sup>b</sup> Inner Mongolia Key Laboratory of Ferroelectric-related New Energy Materials and Devices, Inner Mongolia University of Science and Technology, Baotou 014010, China.

<sup>c</sup> School of Materials and Metallurgy, Inner Mongolia University of Science and Technology, Baotou 014010, China.

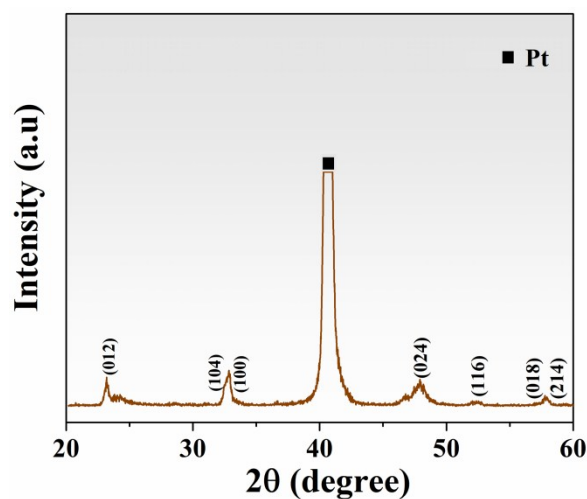

Fig. S1 XRD pattern of the BFMNO thin film with  $d = 700$  nm.

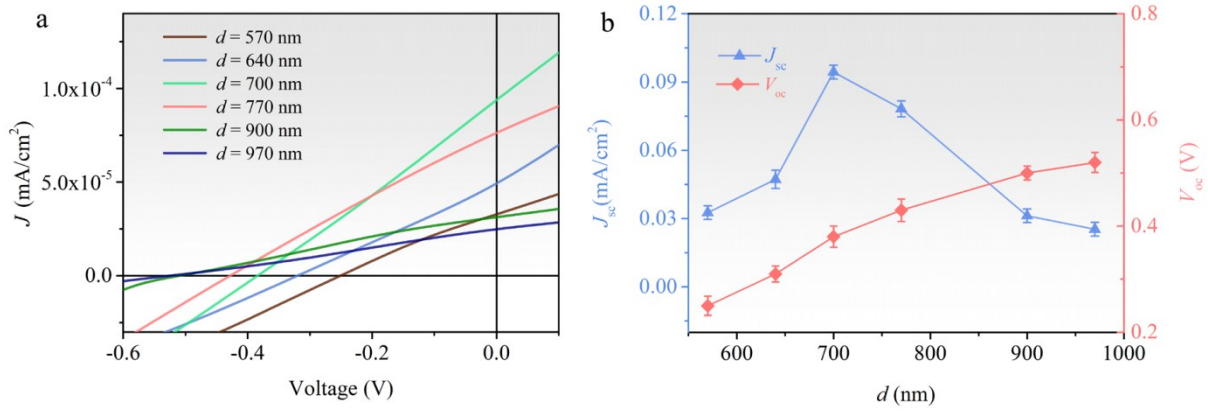

**Fig. S2 (a)** The  $J$ - $V$  characteristics of the BFMNO thin films with different thickness. **(b)** The thickness-dependent  $J_{sc}$  and  $V_{oc}$  of the thin films.

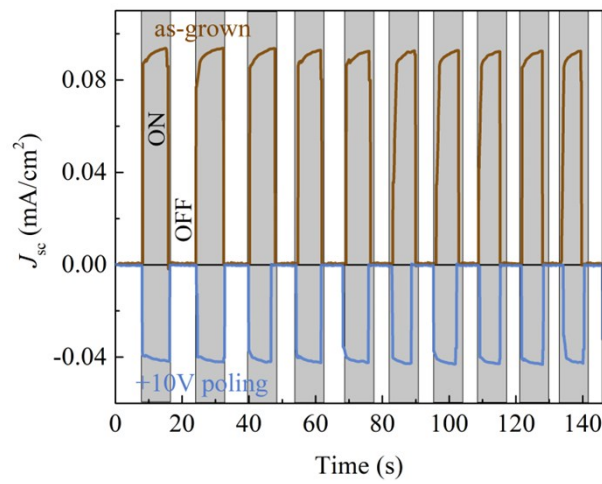

**Fig. S3** The time dependence of photocurrent of BFMNO thin film (700 nm) before and after poling.

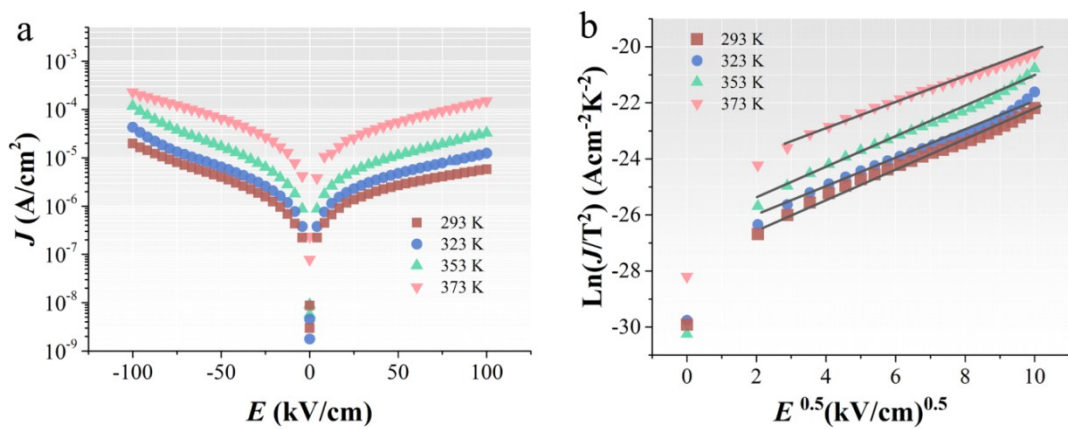

**Fig. S4 (a)** The  $J$ - $E$  measurements of the BFMNO thin film with  $d = 700$  nm at different temperature. **(b)** The Schottky plots under negative bias voltage.

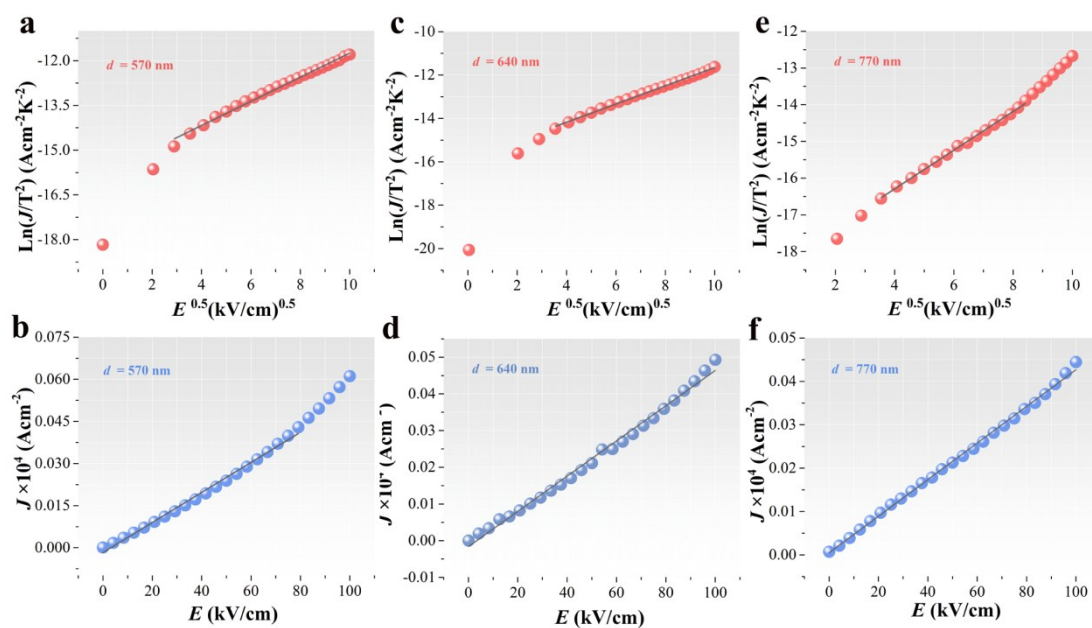

**Fig. S5** The Schottky plots under negative bias voltage and Ohmic plots under positive bias voltage of the thin films with different thickness.

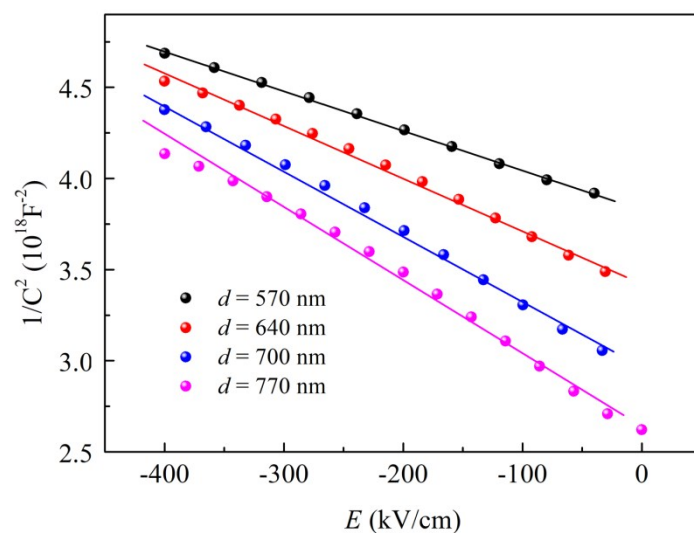

**Fig. S6** The capacitance as the function of electric field for the BFMNO thin films.
